# Supplementary material for: Elevated circulating Gpnmb levels are associated with hyperthyroidism
Source: PubMed Central journal article supplement — Endocr Connect. 2020 Jul 19;9(8):783–92. doi: 10.1530/EC-20-0240 (PMC7487193; doi:10.1530/ec-20-0240), 2020-07-19
Supplement: supplementary_table_1.pdf [file supplementary_table_1.pdf]

**Supplemental Table1** Clinical correlates of serum Gpnmb levels with clinical and biochemical variables before thionamide treatment.

| Variables                                | <i>B</i> | <i>SE</i> | P-value          | Multiple adjusted P-value § |
|------------------------------------------|----------|-----------|------------------|-----------------------------|
| BMI (kg/m <sup>2</sup> )                 | -0.546   | 0.191     | <b>0.005</b>     | <b>0.005</b>                |
| Waist circumference (cm)                 | -0.685   | 0.558     | 0.221            | 0.692                       |
| BMR (%)                                  | 14.954   | 1.296     | <b>&lt;0.001</b> | <b>&lt;0.001</b>            |
| Systolic BP (mmHg)                       | 1.956    | 0.921     | <b>0.035</b>     | <b>0.022</b>                |
| Diastolic BP (mmHg)                      | -1.358   | 0.642     | <b>0.035</b>     | <b>0.041</b>                |
| Total cholesterol (mmol/L)               | -0.546   | 0.058     | <b>&lt;0.001</b> | <b>&lt;0.001</b>            |
| Total triglycerides(mmol/L) <sup>a</sup> | 0.015    | 0.012     | 0.212            | 0.070                       |
| LDL-cholesterol(mmol/L)                  | -0.471   | 0.049     | <b>&lt;0.001</b> | <b>&lt;0.001</b>            |
| HDL-cholesterol(mmol/L)                  | -0.083   | 0.022     | <b>&lt;0.001</b> | <b>&lt;0.001</b>            |
| Fasting glucose (mmol/L)                 | 0.076    | 0.044     | 0.087            | 0.381                       |
| HOMA-IR <sup>a</sup>                     | -0.042   | 0.021     | <b>0.049</b>     | 0.164                       |
| ALT (U/L)                                | 8.201    | 0.855     | <b>&lt;0.001</b> | <b>&lt;0.001</b>            |
| AST (U/L)                                | 4.128    | 0.531     | <b>&lt;0.001</b> | <b>&lt;0.001</b>            |
| Free T3 (pmol/L) <sup>a</sup>            | 0.345    | 0.025     | <b>&lt;0.001</b> | <b>&lt;0.001</b>            |
| Free T4 (pmol/L) <sup>a</sup>            | 0.239    | 0.015     | <b>&lt;0.001</b> | <b>&lt;0.001</b>            |
| TSH (mIU/L) <sup>a</sup>                 | -0.859   | 0.058     | <b>&lt;0.001</b> | <b>&lt;0.001</b>            |
| TPOAb (IU/ml) <sup>a</sup>               | 0.147    | 0.049     | <b>0.003</b>     | <b>0.006</b>                |
| TGAb (IU/ml) <sup>a</sup>                | 0.151    | 0.051     | <b>0.004</b>     | <b>0.024</b>                |
| TRAb (IU/L) <sup>a</sup>                 | 0.575    | 0.041     | <b>&lt;0.001</b> | <b>&lt;0.001</b>            |

BMI=body mass index; BMR=basal metabolic rate; BP=blood pressure; LDL-c=low density lipoprotein cholesterol; HDL-c=high density lipoprotein cholesterol; HOMA-IR=homeostasis model assessment of insulin resistance; ALT=alanine aminotransferase; AST=aspartate aminotransferase; T3=triiodothyronine; T4=thyroxine; TSH= thyroid stimulating hormone; TPOAb=thyroid peroxide antibody; TGAb=thyroglobulin antibody; TRAb=thyrotropin receptor antibody;§: adjusted for age, gender, smoking, and BMI.

<sup>a</sup>: Analysis performed on log-transformed data.
